# Supplementary material for: The Mincle ligand trehalose dibehenate differentially modulates M1‐like and M2‐like macrophage phenotype and function via Syk signaling
Source: PubMed Central journal article supplement (PMC5691301; doi:10.1002/iid3.186), 2017-07-19
Supplement: IID3-5-503-s001.pdf [file IID3-5-503-s001.pdf]

# SUPPORTING INFORMATION

**The Mincle ligand trehalose dibehenate differentially modulates M1-like and M2-like macrophage phenotype and function via Syk signalling.**

Kristel Kodar,<sup>1,2</sup> Jacquie L. Harper,<sup>2</sup> Melanie J. McConnell,<sup>3</sup> Mattie S. M. Timmer,<sup>1,\*</sup> Bridget L. Stocker<sup>1,2,\*</sup>

<sup>1</sup>School of Chemical and Physical Sciences, Victoria University of Wellington, PO Box 600, Wellington, New Zealand

<sup>2</sup>Malaghan Institute of Medical Research, PO Box 7060, Wellington, New Zealand

<sup>3</sup>School of Biological Sciences, Victoria University of Wellington, PO Box 600, Wellington, New Zealand

\*Corresponding authors: Mattie S. M. Timmer and Bridget L. Stocker, School of Chemical and Physical Sciences, Victoria University of Wellington, PO Box 600, Wellington, New Zealand

Phone: +644 463 6529, +644 463 6481

Fax: +64 4 463 5241

E-mail: [mattie.timmer@vuw.ac.nz](mailto:mattie.timmer@vuw.ac.nz), [bridget.stocker@vuw.ac.nz](mailto:bridget.stocker@vuw.ac.nz)

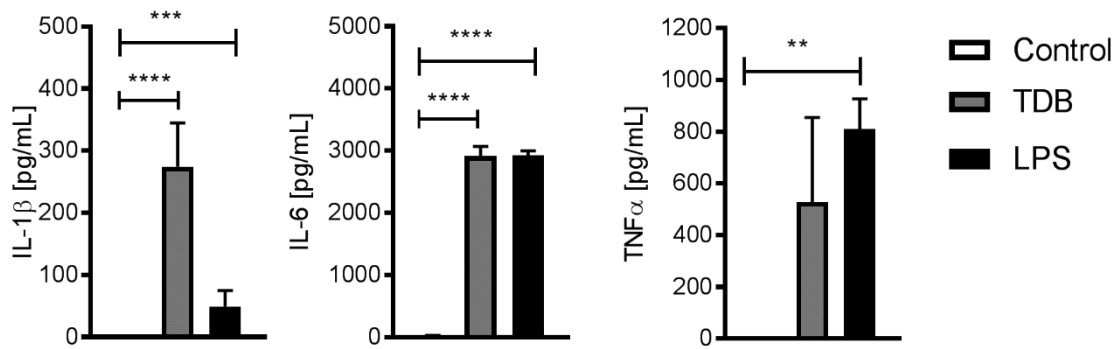

**Figure SI1. TDB induces the production of cytokines in M-CSF differentiated bone marrow macrophages.** BMMs from WT bone marrow were differentiated over 8 days using M-CSF followed by stimulation with 40  $\mu$ g/mL TDB, or 100 ng/mL LPS as positive control. Levels of IL-1 $\beta$ , IL-6 and TNF $\alpha$  were measured by the ELISA from supernatant at 48 h. Mean  $\pm$  SEM of triplicate samples from one experiment are shown. \* P  $\leq$  0.05; \*\*\*\* P  $\leq$  0.001 (1-way ANOVA).
